# Supplementary material
Source: PubMed Central journal article supplement (PMC3878185)
Supplement: NIHMS467752-supplement-1.pdf [file NIHMS467752-supplement-1.pdf]

**Supplementary Information for:**

**Single-cell and metagenomic analyses indicate a fermentative, saccharolytic lifestyle for members of the OP9 lineage**

Jeremy A. Dodsworth<sup>1‡</sup>, Paul C. Blainey<sup>2‡€</sup>, Senthil K. Murugapiran<sup>1</sup>, Wesley D. Swingley<sup>3\*</sup>, Christian A. Ross<sup>1</sup>, Susannah G. Tringe<sup>4</sup>, Patrick S. G. Chain<sup>4,5</sup>, Matthew B. Scholz<sup>4,5</sup>, Chien-Chi Lo<sup>4,5</sup>, Jason Raymond<sup>6</sup>, Stephen R. Quake<sup>2</sup>, and Brian P. Hedlund<sup>1†</sup>

<sup>1</sup>School of Life Sciences, University of Nevada, Las Vegas, Las Vegas, NV, 89154-4004, USA

<sup>2</sup>Department of Bioengineering, Stanford University, and Howard Hughes Medical Institute, Stanford, CA, 94305, USA

<sup>3</sup>School of Natural Sciences, University of California, Merced, Merced, CA, 95343, USA

<sup>4</sup>US Department of Energy Joint Genome Institute, Walnut Creek, CA, 94598, USA

<sup>5</sup>Genome Science Group, Los Alamos National Laboratory, Los Alamos, NM, 87545, USA

<sup>6</sup>School of Earth and Space Exploration, Arizona State University, Tempe, AZ, 85287, USA

€Current address: Broad Institute and Massachusetts Institute of Technology, Department of Biological Engineering, Cambridge, MA 02142, USA

\*Current address: Northern Illinois University, Department of Biological Sciences, DeKalb, IL, 60115 USA

†Corresponding author: [brian.hedlund@unlv.edu](mailto:brian.hedlund@unlv.edu)

‡These authors contributed equally to this work

Supplementary Information includes:

Supplementary Figures S1-S6

Supplementary Tables S1-S5

Supplementary References

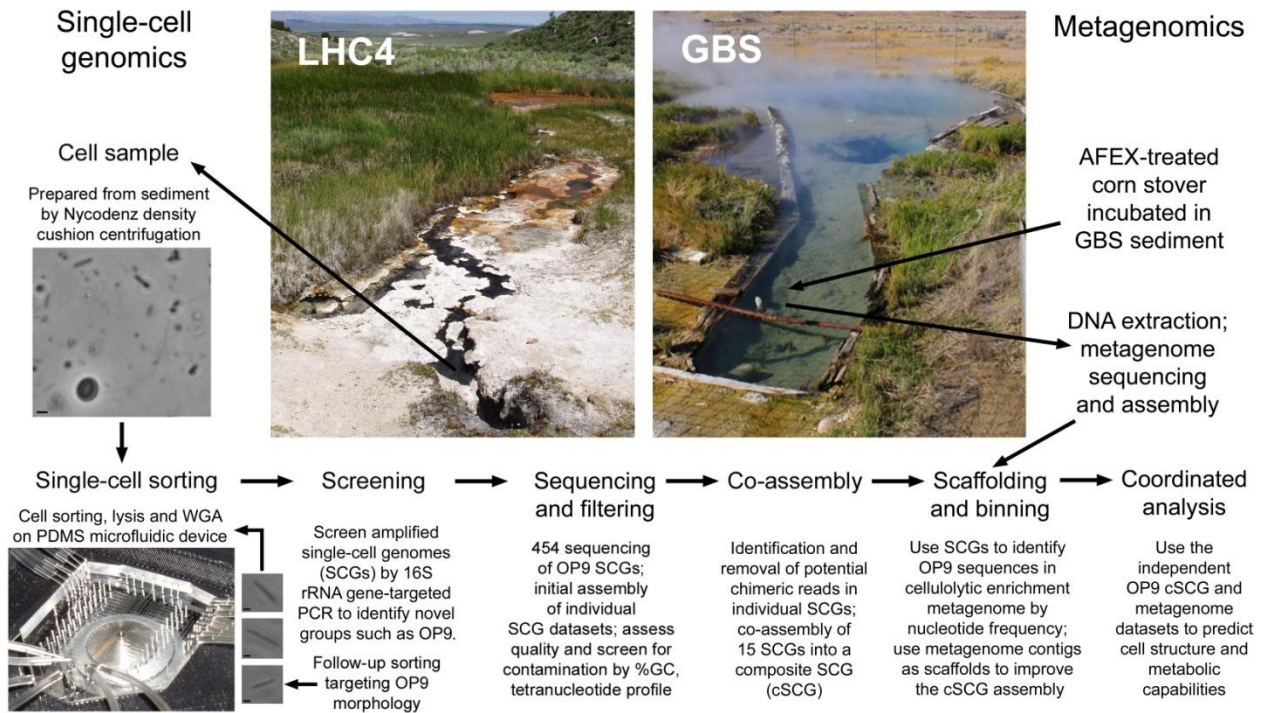

Supplementary Figure S1. Overview of the methods used to obtain distinct genomic datasets from two members of the OP9 lineage using coordinated single-cell genomics and metagenomics analyses. Black bars in phase-contrast photomicrograph insets of cell preparation and sorted OP9 cells represent 1  $\mu$ m in scale.

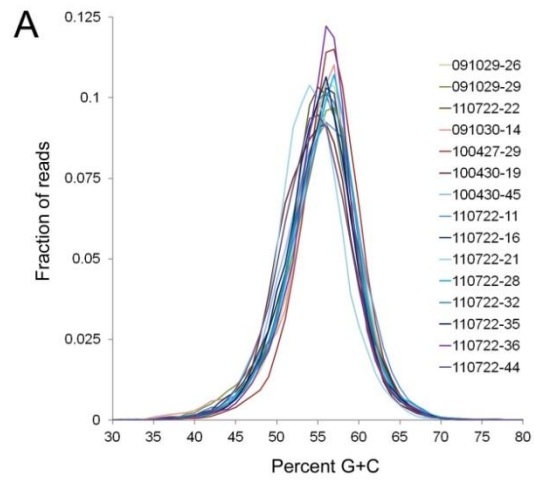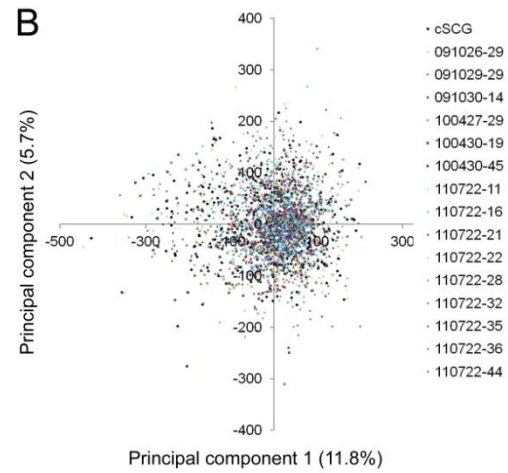

Supplementary Figure S2. Relative uniformity of individual OP9 SCG datasets based on (A) G+C% of individual reads or (B) TNF-PCA of assembled contigs.

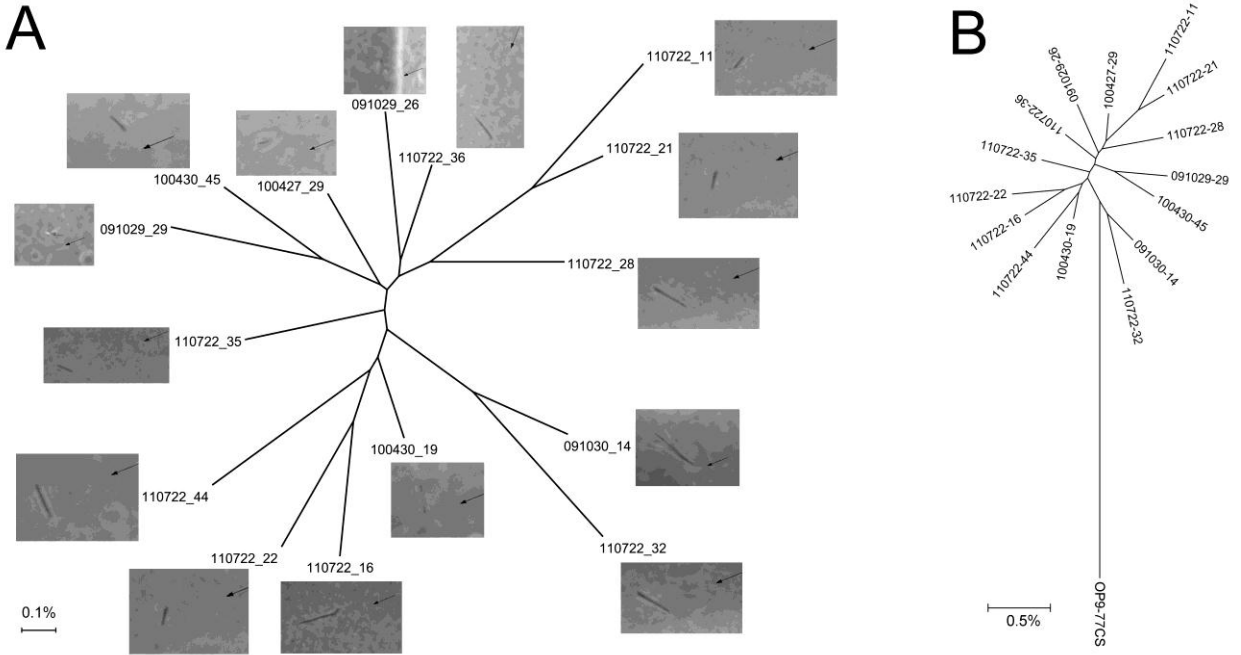

Supplementary Figure S3. Neighbor-joining trees based on distance matrices of pairwise average nucleotide percentage identity. (A) Individual OP9 SCGs, identified by the sorting date in YYMMDD format followed by the chamber into which they were sorted. Scale bar indicates 0.1% sequence divergence. Photomicrographs of each sorted cell are shown, where the arrowhead represents  $\sim 1 \mu\text{m}$ . (B) OP9 SCGs rooted with the OP9-77CS assembly.

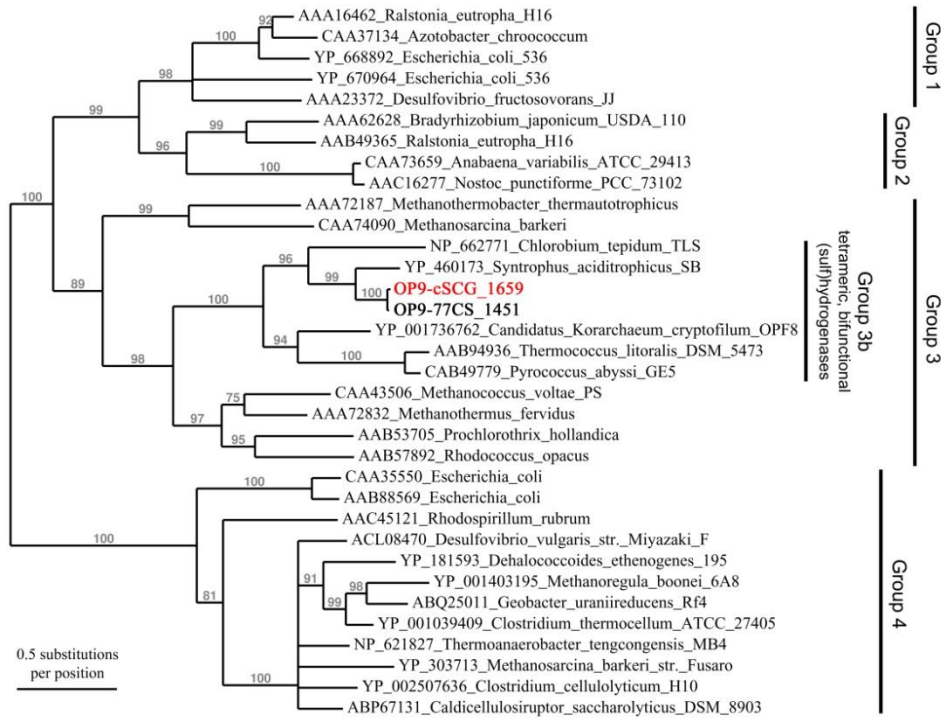

Supplementary Figure S4. Phylogeny of Group 1-4 NiFe hydrogenases, as defined in references 38 and 40 in main text, from OP9 and other organisms, based on 317 aligned positions. Sequences were submitted to phylogeny.fr<sup>61</sup>, where multiple sequence alignment was performed using MUSCLE<sup>62</sup>, phylogeny was inferred by maximum likelihood using PHYML<sup>63</sup>, and the tree was visualized using TreeDyn<sup>64</sup>. Nodes with less than 70% support by approximate likelihood ratio test<sup>65</sup> are collapsed.

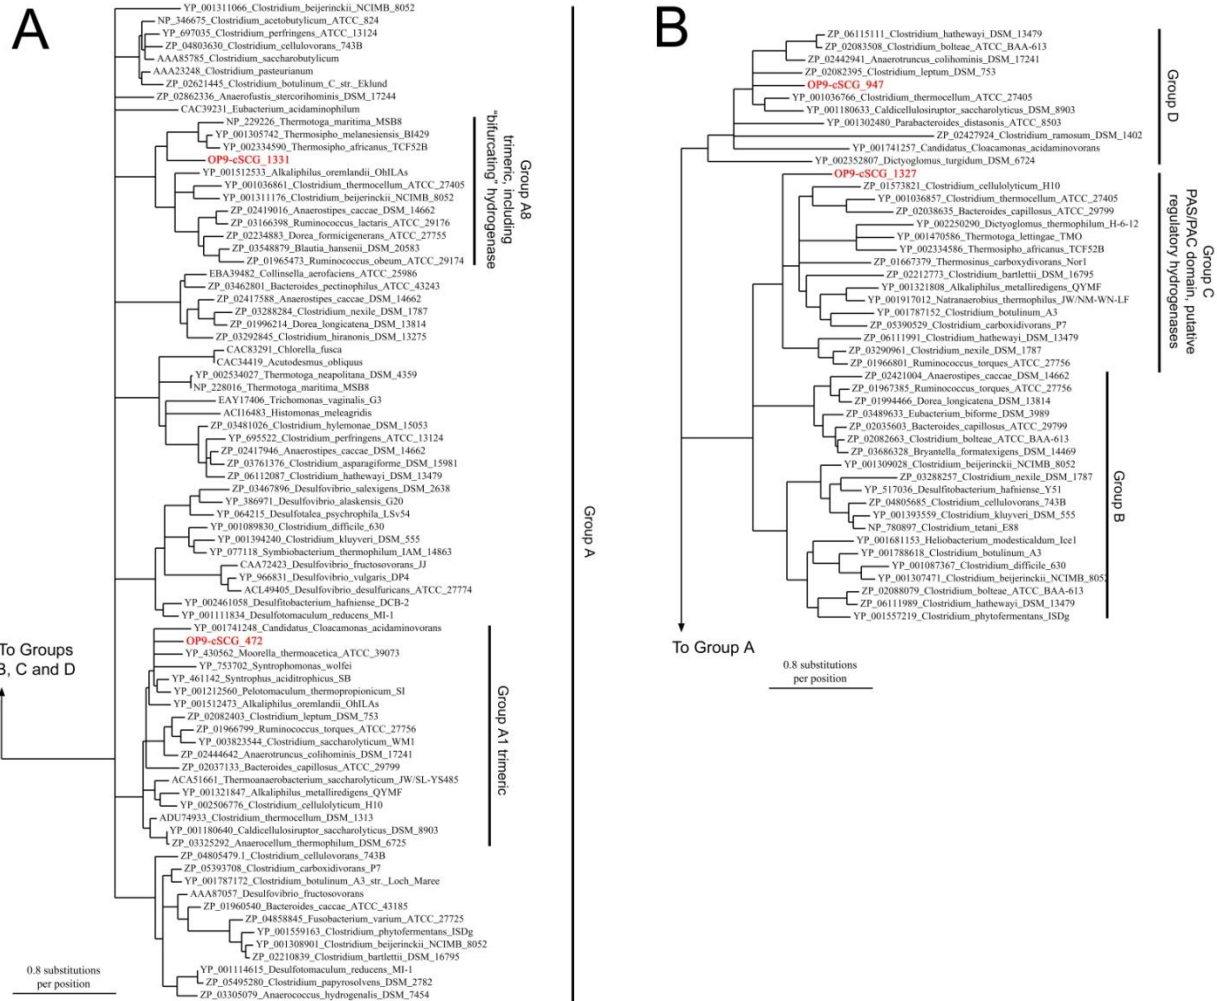

Supplementary Figure S5. Phylogeny of FeFe hydrogenases in (A) Group A and (B) Groups B-D, as defined in references 38 and 40 in main text, from OP9 and other organisms, based on 150 aligned positions. Sequences were submitted to phylogeny.fr<sup>61</sup>, where multiple sequence alignment was performed using MUSCLE<sup>62</sup>, phylogeny was inferred by maximum likelihood using PHYML<sup>63</sup>, and the tree was visualized using TreeDyn<sup>64</sup>. Nodes with less than 70% support by approximate likelihood ratio test<sup>65</sup> are collapsed.

# A

| Organism |                                                                                               | ion specificity             |
|----------|-----------------------------------------------------------------------------------------------|-----------------------------|
| I_tartar | MDMLFAKTVVLAASAVGAGTAMIAGIGPGVG...GYAAGKAVESVARQPEAKGDIISTMVLGQAVASSTGI...SLVIALILLYANPFVGLLG | Na <sup>+</sup>             |
| P_modest | MDMVLAKTVVLAASAVGAGAMIAGIGPGVG...GYAAGKAVESVARQPEAKGDIISTMVLGQAVASSTGI...SLVIALILLYANPFVGLLG  | Na <sup>+</sup>             |
| Clo_para | MERALILAASAIGAGLAMIAGIGPGIG...GFAAGKGAEEVGRQPEAQDILRTMLLGAAVASSTGI...ALVVALILLYANPLNLL        | Na <sup>+</sup>             |
| A_woodii | MEGLDFIKACSAIGAGIAMIAGVPGIG...GFAAGKGAEEVGRQPEAQSDIIRTMLLGAAVASSTGI...GLIVALILLYANPFF         | Na <sup>+</sup>             |
| Alk_meta | MEPITGKALILAASAIGAGLAMIAGIGPGIG...GYAAGKGAEEVGRQPEAQDIVRTMLLGAAVASSTGI...GLI IALILLYANPLVGLL  | Na <sup>+</sup> (predicted) |
| Mycogen  | ..NASAKLGAYIGAVTMIAGSTVIGIG...GYIFPKAVEIARNPEVEKQVFKLIFIGSAVSSSTAI...GLLISFILIFVAGA           | Na <sup>+</sup> (predicted) |
| Fuso_nuc | MDLLTAKTIVLGCASVAGLAMIAGLPGIG...GYAAGKAVESVARQPEARGSIISTMILGQAVASSTGI...SLVIALILLYANPFLSKLG   | Na <sup>+</sup> (predicted) |
| Ru_albus | MLSDKAFVLGCALGAGLAMIAGIGPGIG...GYAVGKTIESIARQPEAQDCTRTMFIGVAMASSTGI...AFVVALILLYMFGNPFIGKLL   | Na <sup>+</sup> (predicted) |
| Th_marit | ..OQLALLGKYLGAGLAMIAGIGPGIG...GNI GAHAMDAMARQPEMVGTTTRMLLADAVASSTGI...SLLIAFMILLVV            | Na <sup>+</sup> (predicted) |
| Burk_mal | MNNLIEVVSIAAALAVSFGAIGPALA...GRAVGAAMDARQPEASGTVSRTLVGLAMITMAI...CLVVALLLLFANPFVK             | H <sup>+</sup> (predicted)  |
| Azo_Vine | MDNPIEIVSILGAALAVSFGALGPALA...GRAVGAAMDARQPEASGTVSRTLVGLAMITMAI...CLVVAVLLLFANPFVH            | H <sup>+</sup> (predicted)  |
| Glu_oxyd | MNWLALASIVSAAAVSFGSIPGALA...GRAVGAAMDARQPEASGTVSRTLVGLAMITMAI...CLVIALLLLFANPLLK              | H <sup>+</sup> (predicted)  |
| D_vulgar | MDSSALGLTCLAAAIIGMAIAAAGCGIG...GMGLKAACEGTARNPEAGGKIMVTLILGLAFVSLAI...ALVVNLLLFANPFMG         | H <sup>+</sup> (predicted)  |
| Geo_sulf | MEFFTMCMLAAGFGMAIGAFGTGIG...GLAVKNAVEGVSINPEASGKILTTMMILGLAMITSLAI...VLVVCILLYANPYKDV..       | H <sup>+</sup> (predicted)  |
| OP9-cSCG | MQGEILFLCITVFTAGFSIALGVMFPAIG...GKACSQALESIARQPEAAGPISRTLVGLAMITSLAI...VLVVSFILLFANPLLYVFK    |                             |
| OP9-77CS | MQGEILFLCITVFTAGFSIALGVMFPAIG...GKACSQALESIARQPEAAGPISRTLVGLAMITSLAI...VLVVSFILLFANPLLYVFK    |                             |
| PCC_7421 | MNDITAAASVIAAALAVGLAAIGPGIG...GNAASKAEGIARQPEAEGKIRGTLTLLSIAFMESLTI...GLVSVI LLYANPFVFG       | H <sup>+</sup>              |
| PCC_6803 | MDSTVAAASVIAAALAVGLGAIIGPGIG...GNASGQAVSGLIARQPEAEGKIRGTLTLLTIAFMESLTI...GLVIALVLLFANPFA      | H <sup>+</sup>              |
| PCC_6716 | MDPLVASASVLAALAIGLASLPGIG...GNASGQAVEGIARQPEAEGKIRGTLTLLTIAFMESLTI...GLVIALVLLFANPFA          | H <sup>+</sup>              |
| Arth_max | MESNLTAAASVIAAALAVGIGSIPGIG...GQAAGQAVEGIARQPEAEGKIRGTLTLLSIAFMESLTI...GLVVALVLLFANPFV        | H <sup>+</sup>              |
| Baci_PS3 | MSLGVLAATAIVGLGALGAGIGNLIVSRTIEGIARQPELRFVLTQTMFIGVAVLALPIIGVVFSPFYLGR                        | H <sup>+</sup>              |
| Cald_the | MGVLAATAIVGLAALGASFGVSNIVSRTIEGIARQPEESRGVLTQTMFIGVAVLALPIIMAVVIAFIALGQ                       | H <sup>+</sup>              |
| Esc_coli | MENLNDMLLYMAAAVMMGLAAIGAIIGILGGKFLGGAARQPDILPLLRTQFFIVMGLV...AIPMIAVGLGLYVMSAVA               | H <sup>+</sup>              |

# B

| Accession number and organism                      | Amino acid position in <i>C. limicola</i> PPase |     |     |     |     | Potassium dependence | Coupling ion    |
|----------------------------------------------------|-------------------------------------------------|-----|-----|-----|-----|----------------------|-----------------|
|                                                    | 180                                             | 242 | 246 | 478 | 481 |                      |                 |
| NP627745 <i>Streptomyces coelicolor</i>            | A                                               | E   | V   | K   | T   | No                   | H <sup>+</sup>  |
| AAC38615 <i>Rhodospirillum rubrum</i>              | S                                               | E   | V   | K   | T   | No                   | H <sup>+</sup>  |
| NP632725 <i>Methanosarcina mazei</i>               | S                                               | E   | V   | K   | T   | No                   | H <sup>+</sup>  |
| AAF01029 <i>Pyrobaculum aerophilum</i>             | S                                               | E   | V   | K   | T   | No                   | H <sup>+</sup>  |
| AAC83018 <i>Arabidopsis thaliana</i> (AVP2)        | S                                               | E   | A   | K   | T   | No                   | H <sup>+</sup>  |
| YP359158 <i>Carboxydotherrmus hydrogenoformans</i> | S                                               | E   | A   | A   | A   | Yes                  | H <sup>+</sup>  |
| ZP02417489 <i>Anaerostipes caccae</i>              | S                                               | E   | G   | A   | G   | Yes                  | Na <sup>+</sup> |
| NP781083 <i>Clostridium tetani</i>                 | S                                               | E   | G   | A   | G   | Yes                  | Na <sup>+</sup> |
| ZP01313190 <i>Desulfuromonas acetoxidans</i>       | S                                               | E   | G   | A   | G   | Yes                  | Na <sup>+</sup> |
| YP430205 <i>Moorella thermoacetica</i>             | S                                               | E   | G   | A   | G   | Yes                  | Na <sup>+</sup> |
| <b>OP9-cSCG and OP9-77CS</b>                       | S                                               | E   | G   | A   | G   |                      |                 |
| NP632724 <i>Methanosarcina mazei</i>               | S                                               | E   | G   | A   | G   | Yes                  | Na <sup>+</sup> |
| NP227989 <i>Thermotoga maritima</i>                | S                                               | E   | G   | A   | G   | Yes                  | Na <sup>+</sup> |
| YP001193220 <i>Chlorobium limicola</i>             | S                                               | E   | G   | A   | G   | Yes                  | Na <sup>+</sup> |
| YP001193830 <i>Flavobacterium johnsoniae</i>       | E                                               | G   | A   | A   | G   | Yes                  | H <sup>+</sup>  |
| YP001840784 <i>Leptospira biflexa</i>              | S                                               | G   | E   | A   | G   | Yes                  | H <sup>+</sup>  |
| AAK38076 <i>Toxoplasma gondii</i>                  | S                                               | G   | E   | A   | G   | Yes                  | H <sup>+</sup>  |
| AAD17215 <i>Plasmodium falciparum</i>              | S                                               | G   | E   | A   | G   | Yes                  | H <sup>+</sup>  |
| XP814868 <i>Trypanosoma cruzi</i>                  | S                                               | G   | E   | A   | G   | Yes                  | H <sup>+</sup>  |
| CAC44451 <i>Chlamydomonas reinhardtii</i>          | S                                               | G   | E   | A   | G   | Yes                  | H <sup>+</sup>  |
| BAA23649 <i>Vigna radiata</i>                      | S                                               | G   | E   | A   | G   | Yes                  | H <sup>+</sup>  |
| AAA32754 <i>Arabidopsis thaliana</i> (AVP1)        | S                                               | G   | E   | A   | G   | Yes                  | H <sup>+</sup>  |

Supplementary Figure S6. Potential ion specificity of OP9 F-type ATP synthases and pyrophosphatases. (A) Amino acid alignment of the C subunit from ATP synthases from OP9 and other organisms with known or predicted ion specificity. Selected sequences and highlighted amino acid residues, including a key threonine residue (marked with an



asterisk, in yellow) involved in specificity for sodium ion transport, are after Figure 4 in Meier et al., 2009<sup>43</sup>. (B) Predicted membrane pyrophosphatases (PPases) from OP9-cSCG and OP9-77CS are 64% identical to the experimentally characterized Na<sup>+</sup>-translocating PPase of *Moorella thermoacetica*, and share conserved residues involved in Na<sup>+</sup>-translocation (positions 180, 242, and 246) and K<sup>+</sup>-dependence (positions 478 and 481). Data from characterized membrane pyrophosphatases are from Figure 1 in Luoto et al., 2011<sup>44</sup>. Sequence abbreviations and accession numbers are as follows: I\_tarta, *Ilyobacter tartaricus* (pdb|1YCE); P\_modest, *Propionigenum modestum* (sp|P21905); Clo\_para, *Clostridium paradoxum*, (ABB13421) A\_woodii, *Acetobacterium woodii* (AFA47026); Alk\_meta, *Alkaliphilus metalliredigens* (YP\_001318237); Myco\_gen, *Mycoplasma genitalium* (NP\_073077); Fuso\_nuc, *Fusobacterium nucleatum* (NP\_603267); Ru\_albus, *Ruminococcus albus* (BAA23683); Th\_marit, *Thermotoga maritima* (NP\_229415); Burk\_mal, *Burkholderia mallei* (YP\_990892); Azo\_vine, *Azotobacter vinelandii* (YP\_002799156); Glu\_oxyd, *Gluconobacter oxydans* (YP\_192564); D\_vulgar, *Desulfovibrio vulgaris* (YP\_967510); Geo\_sulf, *Geobacter sulfurreducens* (NP\_951393); PCC\_7421, *Gloeobacter violaceus* PCC 7421 (NP\_925855); PCC\_6803, *Synechocystis* sp. PCC 6803 (|NP\_440059); PCC\_6716, *Synechococcus* sp. PCC 6716 (Q05366); Arth\_max, *Arthrospira maxima* CS-328 ZP\_03274297); Baci\_PS3, *Bacillus* sp. PS3 (CAA30649); Cald\_the, *Caldalkalibacillus thermarum* (ZP\_08534118); Esc\_coli, *Escherichia coli* (CAA23591).



Supplementary Table S1. Assembly statistics for individual OP9 SCGs.

| Single cell datasets <sup>a</sup> | Total # reads | # reads assembled | total # contigs | Average contig size (bases) | N50 for contigs >500 bases | Assembly size (bases) |
|-----------------------------------|---------------|-------------------|-----------------|-----------------------------|----------------------------|-----------------------|
| 091029-26                         | 94771         | 85466             | 532             | 1639                        | 4021                       | 871951                |
| 091029-29                         | 25986         | 24589             | 354             | 1668                        | 3165                       | 590585                |
| 091030-14                         | 18198         | 15125             | 74              | 1492                        | 5254                       | 110385                |
| 100427-29                         | 113011        | 104107            | 282             | 2365                        | 5700                       | 667036                |
| 100430-19                         | 103534        | 97348             | 161             | 2006                        | 5059                       | 323035                |
| 100430-45                         | 93173         | 87300             | 189             | 2175                        | 4402                       | 411105                |
| 110722-11                         | 34091         | 28769             | 155             | 1440                        | 4306                       | 223258                |
| 110722-16                         | 45486         | 37861             | 268             | 1058                        | 2966                       | 283612                |
| 110722-21                         | 38184         | 30513             | 121             | 933                         | 3070                       | 112855                |
| 110722-22                         | 28715         | 24575             | 128             | 1508                        | 2906                       | 193032                |
| 110722-28                         | 43240         | 36948             | 441             | 1338                        | 2941                       | 590254                |
| 110722-32                         | 52342         | 45406             | 318             | 1392                        | 3742                       | 442776                |
| 110722-35                         | 35788         | 30127             | 253             | 1401                        | 3299                       | 354450                |
| 110722-36                         | 32590         | 27423             | 208             | 1239                        | 3908                       | 257618                |
| 110722-44                         | 103030        | 87549             | 344             | 1438                        | 4578                       | 494684                |

<sup>a</sup> Single cell datasets are identified by the date in YYMMDD format followed by the sort number.

Supplementary Table S2. Conserved markers<sup>a</sup> in the OP9-cSCG and OP9-77CS for estimation of genome completeness.

| Functional class | COG     | Function (annotation)                              | OP9-cSCG CDS <sup>b,c</sup>                                                                    | OP9-77CS CDS <sup>c</sup> |
|------------------|---------|----------------------------------------------------|------------------------------------------------------------------------------------------------|---------------------------|
| Translation      | COG0080 | Ribosomal protein L11                              | 1345                                                                                           | 1818                      |
| Translation      | COG0081 | Ribosomal protein L1                               | 1346                                                                                           | 1819                      |
| Translation      | COG0087 | Ribosomal protein L3                               | 0525                                                                                           | 0870                      |
| Translation      | COG0088 | Ribosomal protein L4                               | 0526                                                                                           | 0871                      |
| Translation      | COG0089 | Ribosomal protein L23                              | 0527                                                                                           | 0872                      |
| Translation      | COG0090 | Ribosomal protein L2                               | 0528                                                                                           | 0873                      |
| Translation      | COG0091 | Ribosomal protein L22                              | 0530                                                                                           | 0875                      |
| Translation      | COG0093 | Ribosomal protein L14                              | 0535                                                                                           | 0880                      |
| Translation      | COG0094 | Ribosomal protein L5                               | 0537                                                                                           | 0882                      |
| Translation      | COG0097 | Ribosomal protein L6P/L9E                          | 0540                                                                                           | 0885                      |
| Translation      | COG0102 | Ribosomal protein L13                              | 0140                                                                                           | 0164                      |
| Translation      | COG0197 | Ribosomal protein L16/L10E                         | 0532                                                                                           | 0877                      |
| Translation      | COG0198 | Ribosomal protein L24                              | 0536                                                                                           | 0881                      |
| Translation      | COG0200 | Ribosomal protein L15                              | 0544                                                                                           | 0889                      |
| Translation      | COG0203 | Ribosomal protein L17                              | 0554                                                                                           | 0899                      |
| Translation      | COG0211 | Ribosomal protein L27                              | 0485                                                                                           | 0429                      |
| Translation      | COG0222 | Ribosomal protein L7/L12                           | 1348                                                                                           | 1821                      |
| Translation      | COG0227 | Ribosomal protein L28                              | 0983                                                                                           | 2018                      |
|                  |         |                                                    | Partial, uncalled ORF (positions 12569-12435 of contig155_S19, 95% nt identity to ORF in 77CS) |                           |
| Translation      | COG0230 | Ribosomal protein L34                              |                                                                                                | 1277                      |
| Translation      | COG0244 | Ribosomal protein L10                              | 1347                                                                                           | 1820                      |
| Translation      | COG0254 | Ribosomal protein L31                              | 1559                                                                                           | 0032                      |
| Translation      | COG0255 | Ribosomal protein L29                              | 0533                                                                                           | 0878                      |
| Translation      | COG0256 | Ribosomal protein L18                              | 0541                                                                                           | 0886                      |
| Translation      | COG0257 | Ribosomal protein L36                              | 0549                                                                                           | 0894                      |
| Translation      | COG0261 | Ribosomal protein L21                              | 0484                                                                                           | 0430                      |
| Translation      | COG0267 | Ribosomal protein L33                              | 0316                                                                                           | 2363                      |
| Translation      | COG0291 | Ribosomal protein L35                              | 0102                                                                                           | 0120                      |
| Translation      | COG0292 | Ribosomal protein L20                              | 0101                                                                                           | 0119                      |
|                  |         |                                                    | Partial, uncalled ORF (positions 67-1 contig010_S1, 100% nt identity to ORF in 77CS)           |                           |
| Translation      | COG0333 | Ribosomal protein L32                              |                                                                                                | 0101                      |
| Translation      | COG0335 | Ribosomal protein L19                              | 0071                                                                                           | 0087                      |
| Translation      | COG0359 | Ribosomal protein L9                               | 0500                                                                                           | 0415                      |
| Translation      | COG1825 | Ribosomal protein L25 (general stress protein Ctc) | Not present                                                                                    | 0592                      |
| Translation      | COG1841 | Ribosomal protein L30/L7E                          | 0543                                                                                           | 0888                      |
| Translation      | COG0048 | Ribosomal protein S12                              | 1167                                                                                           | 1087                      |
| Translation      | COG0049 | Ribosomal protein S7                               | 1166                                                                                           | 1086                      |
| Translation      | COG0051 | Ribosomal protein S10                              | 0524                                                                                           | 0869                      |
| Translation      | COG0052 | Ribosomal protein S2                               | 0674                                                                                           | 1196                      |

|             |         |                                                    |                                                                                        |          |
|-------------|---------|----------------------------------------------------|----------------------------------------------------------------------------------------|----------|
| Translation | COG0092 | Ribosomal protein S3                               | 0531                                                                                   | 0876     |
| Translation | COG0096 | Ribosomal protein S8                               | 0539                                                                                   | 0884     |
| Translation | COG0098 | Ribosomal protein S5                               | 0542                                                                                   | 0887     |
| Translation | COG0099 | Ribosomal protein S13                              | 0550                                                                                   | 0895     |
| Translation | COG0100 | Ribosomal protein S11                              | 0551                                                                                   | 0896     |
| Translation | COG0103 | Ribosomal protein S9                               | 0139                                                                                   | 0163     |
| Translation | COG0184 | Ribosomal protein S15P/S13E                        | 0700                                                                                   | 0493     |
| Translation | COG0185 | Ribosomal protein S19                              | 0529                                                                                   | 0874     |
| Translation | COG0186 | Ribosomal protein S17                              | 0534                                                                                   | 0879     |
| Translation | COG0199 | Ribosomal protein S14                              | 0538                                                                                   | 0883     |
| Translation | COG0228 | Ribosomal protein S16                              | 0075                                                                                   | 0091     |
| Translation | COG0238 | Ribosomal protein S18                              | 0498                                                                                   | 0417     |
| Translation | COG0268 | Ribosomal protein S20                              | 0162                                                                                   | 1376     |
| Translation | COG0360 | Ribosomal protein S6                               | 0495                                                                                   | 0419     |
| Translation | COG0522 | Ribosomal protein S4 and related proteins          | 0552                                                                                   | 0897     |
| Translation | COG0539 | Ribosomal protein S1                               | 1688                                                                                   | 0400     |
| Translation | COG0828 | Ribosomal protein S21                              | 0812                                                                                   | 0519     |
| Translation | COG0008 | Glutamyl-tRNA synthetase                           | 233, 771                                                                               | 566, 810 |
| Translation | COG0008 | Glutamyl-tRNA synthetase                           | 233, 771                                                                               | 566, 810 |
| Translation | COG0013 | Alanyl-tRNA synthetase                             | 1690                                                                                   | 0402     |
| Translation | COG0016 | Phenylalanyl-tRNA synthetase alpha subunit         | 0100                                                                                   | 0118     |
| Translation | COG0017 | Aspartyl/asparaginy-tRNA synthetases               | 0029                                                                                   | 0957     |
| Translation | COG0018 | Arginyl-tRNA synthetase                            | 1176                                                                                   | 0980     |
| Translation | COG0060 | Isoleucyl-tRNA synthetase                          | 0322                                                                                   | 0285     |
| Translation | COG0072 | Phenylalanyl-tRNA synthetase beta subunit          | 0099                                                                                   | 0117     |
| Translation | COG0124 | Histidyl-tRNA synthetase                           | 1686                                                                                   | 0398     |
| Translation | COG0162 | Tyrosyl-tRNA synthetase                            | 0093                                                                                   | 0112     |
| Translation | COG0172 | Seryl-tRNA synthetase                              | 1152                                                                                   | 0936     |
| Translation | COG0173 | Aspartyl-tRNA synthetase                           | 1687                                                                                   | 0399     |
| Translation | COG0180 | Tryptophanyl-tRNA synthetase                       | 0660                                                                                   | 0856     |
| Translation | COG0215 | Cysteiny-tRNA synthetase, class Ia                 | Partial, uncalled ORF (positions 1424-1 contig030_S02, 92% nt identity to ORF in 77CS) | 0809     |
| Translation | COG0215 | Cysteiny-tRNA synthetase                           | Partial, uncalled ORF (positions 1424-1 contig030_S02, 92% nt identity to ORF in 77CS) | 0809     |
| Translation | COG0441 | Threonyl-tRNA synthetase, class IIa                | 1217                                                                                   | 1067     |
| Translation | COG0441 | Threonyl-tRNA synthetase                           | 1217                                                                                   | 1067     |
| Translation | COG0442 | Prolyl-tRNA synthetase                             | 0683                                                                                   | 1187     |
| Translation | COG0495 | Leucyl-tRNA synthetase                             | 0880                                                                                   | 0580     |
| Translation | COG0525 | Valyl-tRNA synthetase                              | 0942                                                                                   | 1506     |
| Translation | COG0751 | Glycyl-tRNA synthetase, beta subunit <sup>d</sup>  | 1725                                                                                   | 1016     |
| Translation | COG0752 | Glycyl-tRNA synthetase, alpha subunit <sup>d</sup> | 1724                                                                                   | 1015     |
| Translation | COG1190 | Lysyl-tRNA synthetase (class II)                   | 0245                                                                                   | 0820     |
| Translation | COG0290 | Translation initiation factor 3 (IF-3)             | 0103                                                                                   | 0121     |

|                         |         |                                                                                        |             |             |
|-------------------------|---------|----------------------------------------------------------------------------------------|-------------|-------------|
| Translation             | COG0361 | Translation initiation factor 1 (IF-1)                                                 | 0548        | 0893        |
| Translation             | COG0532 | Translation initiation factor 2 (IF-2; GTPase)                                         | 1537        | 0011        |
| Histidine biosynthesis  | COG0040 | ATP phosphoribosyltransferase                                                          | 0300        | 0260        |
| Histidine biosynthesis  | COG0079 | Histidinol-phosphate/aromatic aminotransferase and cobyric acid decarboxylase          | 0263        | 0714        |
| Histidine biosynthesis  | COG0106 | Phosphoribosylformimino-5-aminoimidazole carboxamide ribonucleotide (ProFAR) isomerase | 1138        | 0921        |
| Histidine biosynthesis  | COG0107 | Imidazoleglycerol-phosphate synthase                                                   | 1137        | 0921        |
| Histidine biosynthesis  | COG0118 | Glutamine amidotransferase                                                             | 1139        | 0923        |
| Histidine biosynthesis  | COG0131 | Imidazoleglycerol-phosphate dehydratase                                                | 1140        | 0924        |
| Histidine biosynthesis  | COG0139 | Phosphoribosyl-AMP cyclohydrolase                                                      | 1136        | 0920        |
| Histidine biosynthesis  | COG0140 | Phosphoribosyl-ATP pyrophosphohydrolase                                                | 1136        | 0920        |
| Histidine biosynthesis  | COG0141 | Histidinol dehydrogenase                                                               | 0301        | 0261        |
| Histidine biosynthesis  | COG0241 | Histidinol phosphatase and related phosphatases                                        | 0013        | 1104        |
| Histidine biosynthesis  | COG0462 | Phosphoribosylpyrophosphate synthetase                                                 | Not present | 0593        |
| Chorismate biosynthesis | COG0082 | Chorismate synthase                                                                    | 1577        | 0047        |
| Chorismate biosynthesis | COG0128 | 5-enolpyruvylshikimate-3-phosphate synthase                                            | 0666        | 0850        |
| Chorismate biosynthesis | COG0169 | Shikimate 5-dehydrogenase                                                              | 1695        | 0406        |
| Chorismate biosynthesis | COG0337 | 3-dehydroquinate synthetase                                                            | 0639        | 1036        |
| Chorismate biosynthesis | COG0703 | Shikimate kinase                                                                       | 0638        | 1037        |
| Chorismate biosynthesis | COG0710 | 3-dehydroquinate dehydratase                                                           | 0640        | 1035        |
| Chorismate biosynthesis | COG0722 | 3-deoxy-D-arabino-heptulosonate 7-phosphate (DAHP) synthase                            | 1580        | 50-51       |
| Chorismate biosynthesis | COG1605 | Chorismate mutase                                                                      | 0665        | 0851        |
| Threonine biosynthesis  | COG0083 | Homoserine kinase                                                                      | 0257        | 0709        |
| Threonine biosynthesis  | COG0136 | Aspartate-semialdehyde dehydrogenase                                                   | 0255        | 0707        |
| Threonine biosynthesis  | COG0460 | Homoserine dehydrogenase                                                               | 0017        | 1101        |
| Threonine biosynthesis  | COG0498 | Threonine synthase                                                                     | 0258        | 0710        |
| Threonine biosynthesis  | COG0527 | Aspartokinases                                                                         | 0256        | 0708        |
| Tryptophan biosynthesis | COG0133 | Tryptophan synthase beta chain                                                         | 0306        | 0266        |
| Tryptophan biosynthesis | COG0134 | Indole-3-glycerol phosphate synthase                                                   | 0308        | 0268        |
| Tryptophan biosynthesis | COG0135 | Phosphoribosylantranilate isomerase                                                    | 0307        | 0267        |
| Tryptophan biosynthesis | COG0147 | Anthranilate/para-aminobenzoate synthases component I                                  | 0312        | 0272        |
| Tryptophan biosynthesis | COG0159 | Tryptophan synthase alpha chain                                                        | 0305        | 0265        |
| Tryptophan biosynthesis | COG0512 | Anthranilate/para-aminobenzoate synthases component II                                 | 0310        | 0270        |
| Tryptophan biosynthesis | COG0547 | Anthranilate phosphoribosyltransferase                                                 | 0309        | 0269        |
| Coenzyme A biosynthesis | COG0237 | Dephospho-CoA kinase                                                                   | 0114        | 0138        |
| Coenzyme A biosynthesis | COG0413 | Ketopantoate hydroxymethyltransferase                                                  | Not present | Not present |
| Coenzyme A biosynthesis | COG0414 | Panthothenate synthetase                                                               | Not present | Not present |
| Coenzyme A biosynthesis | COG0452 | Phosphopantetheinoylcysteine synthetase/decarboxylase                                  | 0975        | 0635        |
| Coenzyme A biosynthesis | COG0669 | Phosphopantetheine adenyllyltransferase                                                | 0086        | 0105        |
| Coenzyme A biosynthesis | COG0853 | Aspartate 1-decarboxylase                                                              | Not present | Not present |
| Coenzyme A biosynthesis | COG1072 | Panthothenate kinase                                                                   | 0052        | 1790        |
| Coenzyme A biosynthesis | COG1893 | Ketopantoate reductase                                                                 | Not present | Not present |
| FAD biosynthesis        | COG0054 | Riboflavin synthase beta-chain                                                         | Not present | Not present |

|                         |         |                                                                                       |                                                                                             |             |
|-------------------------|---------|---------------------------------------------------------------------------------------|---------------------------------------------------------------------------------------------|-------------|
| FAD biosynthesis        | COG0108 | 3,4-dihydroxy-2-butanone 4-phosphate synthase                                         | Not present                                                                                 | Not present |
| FAD biosynthesis        | COG0117 | Pyrimidine deaminase                                                                  | Not present                                                                                 | Not present |
| FAD biosynthesis        | COG0196 | FAD synthase                                                                          | 1531                                                                                        | 0006        |
| FAD biosynthesis        | COG0307 | Riboflavin synthase alpha chain                                                       | Not present                                                                                 | Not present |
| FAD biosynthesis        | COG0807 | GTP cyclohydrolase II                                                                 | Not present                                                                                 | Not present |
| FAD biosynthesis        | COG1985 | Pyrimidine reductase, riboflavin biosynthesis                                         | Not present                                                                                 | Not present |
| Isoprenoid biosynthesis | COG0245 | 2C-methyl-D-erythritol 2,4-cyclodiphosphate synthase                                  | 0236                                                                                        | 0812        |
| Isoprenoid biosynthesis | COG0743 | 1-deoxy-D-xylulose 5-phosphate reductoisomerase                                       | 0680                                                                                        | 1190        |
| Isoprenoid biosynthesis | COG1154 | Deoxyxylulose-5-phosphate synthase                                                    | 0347                                                                                        | 1486        |
| Isoprenoid biosynthesis | COG1211 | 4-diphosphocytidyl-2-methyl-D-erythritol synthase                                     | 0237                                                                                        | 0813        |
| Isoprenoid biosynthesis | COG1947 | 4-diphosphocytidyl-2C-methyl-D-erythritol 2-phosphate synthase                        | 1173                                                                                        | 1093        |
| Isoprenoid biosynthesis | COG0761 | Penicillin tolerance protein                                                          | 0668                                                                                        | 0848        |
| Isoprenoid biosynthesis | COG0821 | Enzyme involved in the deoxyxylulose pathway of isoprenoid biosynthesis               | 0682                                                                                        | 1188        |
| Isoprenoid biosynthesis | COG0020 | Undecaprenyl pyrophosphate synthase                                                   | 0678                                                                                        | 1192        |
| Purine biosynthesis     | COG0015 | Adenylosuccinate lyase                                                                | 1244                                                                                        | 2014        |
| Purine biosynthesis     | COG0026 | Phosphoribosylaminoimidazole carboxylase (NCAIR synthetase)                           | 1282                                                                                        | 2305        |
| Purine biosynthesis     | COG0027 | Formate-dependent phosphoribosylglycinamide formyltransferase (GAR transformylase)    | 1868                                                                                        | 1212        |
| Purine biosynthesis     | COG0034 | Glutamine phosphoribosylpyrophosphate amidotransferase                                | 0290                                                                                        | 0248        |
| Purine biosynthesis     | COG0041 | Phosphoribosylcarboxyaminoimidazole (NCAIR) mutase                                    | 1283                                                                                        | 2306        |
| Purine biosynthesis     | COG0046 | Phosphoribosylformylglycinamide (FGAM) synthase, synthetase domain                    | 0292                                                                                        | 0249        |
| Purine biosynthesis     | COG0047 | Phosphoribosylformylglycinamide (FGAM) synthase, glutamine amidotransferase domain    | Partial, uncalled ORF (positions 31031-30585 contig031_S02, 91% nt identity to ORF in 77CS) | 0250        |
| Purine biosynthesis     | COG0104 | Adenylosuccinate synthase                                                             | 0123                                                                                        | 0147        |
| Purine biosynthesis     | COG0138 | AICAR transformylase/IMP cyclohydrolase PurH (only IMP cyclohydrolase domain in AfuI) | 1683                                                                                        | 0395        |
| Purine biosynthesis     | COG0150 | Phosphoribosylaminoimidazole (AIR) synthetase                                         | 1869                                                                                        | 1213        |
| Purine biosynthesis     | COG0151 | Phosphoribosylamine-glycine ligase                                                    | 1867                                                                                        | 1210        |
| Purine biosynthesis     | COG0152 | Phosphoribosylaminoimidazolesuccinocarboxamide (SAICAR) synthase                      | 0297                                                                                        | 0258        |
| Purine biosynthesis     | COG0299 | Folate-dependent phosphoribosylglycinamide formyltransferase PurN                     | 1868                                                                                        | 1212        |
| Purine biosynthesis     | COG0516 | IMP dehydrogenase/GMP reductase                                                       | 0125                                                                                        | 0149        |
| Purine biosynthesis     | COG0518 | GMP synthase - Glutamine amidotransferase domain                                      | 0124                                                                                        | 0148        |
| Purine biosynthesis     | COG0519 | GMP synthase, PP-ATPase domain/subunit                                                | 0124                                                                                        | 0148        |
| Purine biosynthesis     | COG0563 | Adenylate kinase and related kinases                                                  | 0546                                                                                        | 0891        |
| Pyrimidine biosynthesis | COG0105 | Nucleoside diphosphate kinase                                                         | Not present                                                                                 | 2215        |
| Pyrimidine biosynthesis | COG0167 | Dihydroorotate dehydrogenase                                                          | 0359                                                                                        | 1549        |
| Pyrimidine biosynthesis | COG0283 | Cytidylate kinase                                                                     | 0667                                                                                        | 0849        |
| Pyrimidine biosynthesis | COG0284 | Orotidine-5-phosphate decarboxylase                                                   | Partial, uncalled ORF (positions 782-4 contig041_S03, 88% nt identity to ORF in 77CS)       | 1547        |
| Pyrimidine biosynthesis | COG0418 | Dihydroorotase                                                                        | 0361                                                                                        | 1546        |
| Pyrimidine biosynthesis | COG0458 | Carbamoylphosphate synthase large subunit (split gene in MJ)                          | 0709                                                                                        | 0501        |
| Pyrimidine biosynthesis | COG0461 | Orotate phosphoribosyltransferase                                                     | 0358                                                                                        | 1550        |
| Pyrimidine biosynthesis | COG0504 | CTP synthase (UTP-ammonia lyase)                                                      | 1175                                                                                        | 0979        |
| Pyrimidine biosynthesis | COG0505 | Carbamoylphosphate synthase small subunit                                             | 0711                                                                                        | 0502        |

|                                                             |         |                                                            |             |             |
|-------------------------------------------------------------|---------|------------------------------------------------------------|-------------|-------------|
| Pyrimidine biosynthesis                                     | COG0528 | Uridylate kinase                                           | 0676        | 1194        |
| Pyrimidine biosynthesis                                     | COG0540 | Aspartate carbamoyltransferase, catalytic chain            | 0363        | 1545        |
| Pyrimidine biosynthesis                                     | COG0125 | Thymidylate kinase                                         | 1862        | 1205        |
| Pyrimidine biosynthesis                                     | COG0207 | Thymidylate synthase                                       | 1558        | 0031        |
| Pyrimidine biosynthesis                                     | COG0717 | Deoxycytidine deaminase                                    | Not present | Not present |
| Pyrimidine biosynthesis                                     | COG0756 | dUTPase                                                    | 0986        | 1179        |
| Sec translocase                                             | COG0201 | Preprotein translocase subunit SecY                        | 0545        | 0890        |
| Sec translocase                                             | COG0341 | Preprotein translocase subunit SecF                        | 0375        | 0724        |
| Sec translocase                                             | COG0342 | Preprotein translocase subunit SecD                        | 0374        | 0723        |
| Sec translocase                                             | COG0653 | Preprotein translocase subunit SecA (ATPase, RNA helicase) | 0755        | 0550        |
| Sec translocase                                             | COG0690 | Preprotein translocase subunit SecE                        | 1343        | 2356        |
| Sec translocase                                             | COG0706 | Preprotein translocase subunit YidC                        | 1367        | 1921        |
| Sec translocase                                             | COG1314 | Preprotein translocase subunit SecG                        | Not present | Not present |
| Sec translocase                                             | COG1862 | Preprotein translocase subunit YajC                        | 0373        | 0722        |
| Sec translocase                                             | COG1952 | Preprotein translocase subunit SecB                        | Not present | Not present |
| Transcription                                               | COG0085 | DNA-directed RNA polymerase, beta subunit/140 kD subunit   | 1170        | 1090        |
| Transcription                                               | COG0086 | DNA-directed RNA polymerase, beta' subunit/160 kD subunit  | 1169        | 1089        |
| Transcription                                               | COG0202 | DNA-directed RNA polymerase, alpha subunit/40 kD subunit   | 0553        | 0898        |
| Transcription                                               | COG0568 | DNA-directed RNA polymerase, sigma subunit RpoD            | 1731        | 1022        |
| Transcription                                               | COG0568 | DNA-directed RNA polymerase, sigma subunit RpoS            | 1731        | 1022        |
| Transcription                                               | COG1758 | DNA-directed RNA polymerase, subunit K/omega               | 0974        | 0636        |
| <hr/>                                                       |         |                                                            |             |             |
| All markers                                                 |         |                                                            | OP9-cSCG    | OP9-77CS    |
| Markers present                                             |         |                                                            | 164         | 167         |
| Total number of markers                                     |         |                                                            | 181         | 181         |
| % of total markers present                                  |         |                                                            | 91.2        | 92.8        |
| <hr/>                                                       |         |                                                            |             |             |
| All markers except those involved in FAD and Co-A synthesis |         |                                                            | OP9-cSCG    | OP9-77CS    |
| Markers present                                             |         |                                                            | 160         | 163         |
| Total number of markers                                     |         |                                                            | 166         | 166         |
| % of total markers present                                  |         |                                                            | 96.4        | 98.2        |

<sup>a</sup> Markers used for estimation of genome coverage by Martin et al. (2006)<sup>29</sup>, were identified in the OP9 genomes by COGs and RAST annotation.

<sup>b</sup> Several markers identified as uncalled ORFs (partial genes) in the OP9-cSCG by tBLASTn of the corresponding marker in the OP9-77CS were counted as present.

<sup>c</sup> Numbers correspond to the gene number in the assemblies on RAST and submitted to Genbank.

<sup>d</sup> Class II glycyl-tRNA synthetase (COG0423) was not included in the analysis because of the presence of the Class I glycyl-tRNA synthetases in OP9-cSCG and OP9-77CS.

Supplementary Table S3. Organisms and 16S rRNA gene sequence accession numbers used for phylogenetic inference.

| Phylum <sup>a</sup> | Genbank Accession number | Organism/clone name                  |
|---------------------|--------------------------|--------------------------------------|
| Firmicutes          | AADT03000052             | <i>Moorella thermoacetica</i>        |
| Firmicutes          | AF022248                 | <i>Syntrophomonas wolfei</i>         |
| Firmicutes          | D26185                   | <i>Bacillus subtilis</i>             |
| Firmicutes          | CP001785                 | <i>Ammoniafex degensii</i>           |
| Firmicutes          | FR749972                 | <i>Caldanaerobacter subterraneus</i> |
| Firmicutes          | NC_009012                | <i>Clostridium thermocellum</i>      |
| Actinobacteria      | X60514                   | <i>Streptomyces coelicolor</i>       |
| Actinobacteria      | U75647                   | <i>acidimicrobium ferrooxidans</i>   |
| Actinobacteria      | AJ243871                 | <i>Rubrobacter xylanophilus</i>      |
| Actinobacteria      | AE014295                 | <i>Bifidobacterium longum</i>        |
| Acidobacteria       | X77215                   | <i>Holophaga foetida</i>             |
| Acidobacteria       | D26171                   | <i>Acidobacterium capsulatum</i>     |
| Armatimonadetes     | AB529679                 | <i>Armatimonas rosea</i>             |
| Armatimonadetes     | AM749780                 | <i>Chthonomonas calidirosea</i>      |
| Armatimonadetes     | GQ339893                 | <i>Fimbriimonas ginsengisoli</i>     |
| Verrucomicrobia     | X90515                   | <i>Verrucomicrobium spinosum</i>     |
| Verrucomicrobia     | NR_028890                | <i>Opitutus terrae</i>               |
| Aquificae           | M83548                   | <i>Aquifex pyrophilus</i>            |
| Aquificae           | D16296                   | <i>Hydrogenobaculum acidophilus</i>  |
| Aquificae           | AJ278895                 | <i>Thermocrinis albus</i>            |
| Thermotogae         | M59176                   | <i>Fervidobacterium icelandicum</i>  |
| Thermotogae         | L10659                   | <i>Geotoga subterranea</i>           |
| Thermotogae         | CP000702                 | <i>Thermotoga petrophila</i>         |
| Chloroflexi         | CP001275                 | <i>Thermomicrobium roseum</i>        |
| Chloroflexi         | CP000909                 | <i>Chloroflexus aurantiacus</i>      |
| Chloroflexi         | RN_040878                | <i>Caldilinea aerophila</i>          |
| Thermi              | L09663                   | <i>Thermus aquaticus</i>             |
| Thermi              | NR_027614                | <i>Meiothermus ruber</i>             |
| Thermi              | M21413                   | <i>Deinococcus radiodurans</i>       |



|                  |                            |                                                                                                 |
|------------------|----------------------------|-------------------------------------------------------------------------------------------------|
| Bacteroidetes    | EU823302                   | <i>Leeuwenhoekiella marinoflava</i>                                                             |
| Bacteroidetes    | NR_042496                  | <i>Flavobacterium johnsoniae</i>                                                                |
| Bacteroidetes    | L11703                     | <i>Thermonema lapsum</i>                                                                        |
| Proteobacteria   | D14516                     | <i>Sinorhizobium fredii</i>                                                                     |
| Proteobacteria   | M11223                     | <i>Agrobacterium tumefaciens</i>                                                                |
| Proteobacteria   | AY268175                   | <i>Pseudomonas aeruginosa</i>                                                                   |
| Proteobacteria   | AF353160                   | <i>Nitrosomonas europaea</i>                                                                    |
| Cyanobacteria    | D83715                     | <i>Synechococcus elongatus</i>                                                                  |
| Cyanobacteria    | BA000045                   | <i>Gloeobacter violaceus</i>                                                                    |
| Cyanobacteria    | NR_028762                  | <i>Prochlorococcus marinus</i>                                                                  |
| Cyanobacteria    | AB428654                   | <i>Nostoc commune</i>                                                                           |
| Synergistetes    | AF073521                   | <i>Aminobacterium mobile</i>                                                                    |
| Synergistetes    | NR_036784                  | <i>Anaerobaculum thermoterrnum</i>                                                              |
| Synergistetes    | CP001818                   | <i>Thermanaerovibrio acidaminovorans</i>                                                        |
| Synergistetes    | DQ071273                   | <i>Thermovirga lienlii</i>                                                                      |
| Dictyoglomi      | NR_029235                  | <i>Dictyoglomus thermophilum</i>                                                                |
| Dictyoglomi      | NR_043385                  | <i>Dictyoglomus turgidum</i>                                                                    |
| Cand. phylum JS1 | AF029050                   | Clone SB-45                                                                                     |
| Cand. phylum JS1 | AB015271                   | Clone JTB243                                                                                    |
| Cand. phylum JS1 | AY053496                   | Clone AT425Eub_A5                                                                               |
| Cand. phylum JS1 | AY093469                   | Nankai Forearc Basin clone MB-B2-103                                                            |
| Cand. phylum JS1 | AF154106                   | Hydrocarbon seep clone GCA025                                                                   |
| Cand. phylum JS1 | AJ535219                   | Hydrate Ridge clone Hyd01-10                                                                    |
| Cand. phylum JS1 | AF029043                   | Benzene-mineralizing consortium clone SB-15                                                     |
| Cand. phylum OP9 | <a href="#">AB710366.1</a> | Uncultured bacterium gene for 16S ribosomal RNA, partial sequence, clone: N2>CO2B5              |
| Cand. phylum OP9 | <a href="#">EF205555.1</a> | Uncultured candidate division OP9 bacterium clone TP29 16S ribosomal RNA gene, partial sequence |
| Cand. phylum OP9 | <a href="#">FN356241.1</a> | Uncultured bacterium 16S rRNA gene, clone Dan_Bac32                                             |
| Cand. phylum OP9 | <a href="#">FR744612.1</a> | Uncultured bacterium partial 16S rRNA gene, clone PWB042                                        |
| Cand. phylum OP9 | <a href="#">AF027082.1</a> | Candidate division OP9 clone OPB47 16S ribosomal RNA gene, complete sequence                    |
| Cand. phylum OP9 | <a href="#">AF027081.1</a> | Candidate division OP9 clone OPB46 16S ribosomal RNA gene, complete sequence                    |
| Cand. phylum OP9 | <a href="#">EU635950.1</a> | Uncultured bacterium clone SSW_L1_H02 16S ribosomal RNA gene, partial sequence                  |
| Cand. phylum OP9 | <a href="#">EU924241.1</a> | Uncultured bacterium clone LHC4_L1_A09 16S                                                      |

|                  |                            |                                                                                                  |
|------------------|----------------------------|--------------------------------------------------------------------------------------------------|
|                  |                            | ribosomal RNA gene, partial sequence                                                             |
| Cand. phylum OP9 | <a href="#">HM041949.1</a> | Uncultured candidate division OP9 bacterium clone NRB32 16S ribosomal RNA gene, partial sequence |
| Cand. phylum OP9 | <a href="#">FN356272.1</a> | Uncultured bacterium 16S rRNA gene, clone Dan_Bac65                                              |
| Cand. phylum OP9 | <a href="#">EU334519.1</a> | Uncultured bacterium clone CB05 16S ribosomal RNA gene, partial sequence                         |
| Cand. phylum OP9 | <a href="#">AJ420322.1</a> | uncultured bacterium partial 16S rRNA gene, clone SHA-110                                        |
| Cand. phylum OP9 | <a href="#">EF559042.1</a> | Uncultured bacterium clone A55_D21_L_B_C04 16S ribosomal RNA gene, partial sequence              |
| Cand. phylum OP9 | <a href="#">FN436137.1</a> | Uncultured bacterium partial 16S rRNA gene, clone HAW-R60-B-924d-G                               |
| Cand. phylum OP9 | <a href="#">JF417929.1</a> | Uncultured bacterium clone 1-1B-38 16S ribosomal RNA gene, partial sequence                      |
| Cand. phylum OP9 | <a href="#">FN436061.1</a> | Uncultured bacterium partial 16S rRNA gene, clone HAW-R60-B-727d-S                               |
| Cand. phylum OP9 | <a href="#">EF558973.1</a> | Uncultured bacterium clone B55_F_B_E11 16S ribosomal RNA gene, partial sequence                  |
| Cand. phylum OP9 | <a href="#">FJ535531.1</a> | Uncultured bacterium clone SWADLP3-17 16S ribosomal RNA gene, partial sequence                   |
| Cand. phylum OP9 | <a href="#">FN436208.1</a> | Uncultured bacterium partial 16S rRNA gene, clone HAW-R60-B-1249d-AH                             |
| Cand. phylum OP9 | <a href="#">AB546037.1</a> | Uncultured bacterium gene for 16S rRNA, partial sequence, clone: ARWH-BH02                       |
| Cand. phylum OP9 | <a href="#">EF688189.1</a> | Uncultured bacterium clone 4B10_cons 16S ribosomal RNA gene, partial sequence                    |
| Cand. phylum OP9 | <a href="#">EU592420.1</a> | Uncultured bacterium clone SSS11N 16S ribosomal RNA gene, partial sequence                       |
| Cand. phylum OP9 | <a href="#">AB332115.1</a> | Uncultured bacterium gene for 16S rRNA, partial sequence, clone: EPE303                          |
| Cand. phylum OP9 | <a href="#">EU639006.1</a> | Uncultured bacterium clone SHBZ497 16S ribosomal RNA gene, partial sequence                      |
| Cand. phylum OP9 | <a href="#">EU638743.1</a> | Uncultured bacterium clone SHBZ1212 16S ribosomal RNA gene, partial sequence                     |
| Cand. phylum OP9 | <a href="#">CU924348.1</a> | Uncultured OP9 bacterium 16S rRNA gene from clone QEDP3DA09                                      |

<sup>a</sup> 16S rRNA gene sequences representing members of the candidate phylum OP9, both those included in this analysis and those excluded due to their shorter length or similarity to included sequences. In addition to references 1 and 19-23 in the main text, OP9 sequences have been recovered from environments including terrestrial geothermal systems<sup>66-69</sup>, eutrophic saline lakes<sup>70</sup>, petroleum reservoirs<sup>71-74</sup>, thermal bioreactors and digesters<sup>75-80</sup>, and wastewater treatment facilities<sup>81-83</sup>.

Supplementary Table S4. Markers diagnostic for a diderm cell envelope structure<sup>a</sup>

| Protein name | Function/annotation                       | Pfam number | cSCG CDS <sup>b</sup> | cSCG e-value      | 77CS CDS <sup>b</sup> | 77CS e-value |
|--------------|-------------------------------------------|-------------|-----------------------|-------------------|-----------------------|--------------|
| BamA         |                                           |             |                       |                   |                       |              |
| (YaeT)       | OM <sup>c</sup> assembly                  | PF01103     | 1613                  | 8.2E-49           | 0186                  | 4.7E-50      |
| BamA         |                                           |             |                       |                   |                       |              |
| (YaeT)       | OM <sup>c</sup> assembly                  | PF07244     | 1613                  | 3.6E-07           | 0186                  | 7.4E-12      |
| OmpH         | Periplasm chaperone/OM <sup>c</sup> porin | PF03938     | 1612                  | 2.2E-05           | 0185                  | 1.4E-12      |
| TolC         | Type 1 secretion                          | PF02321     | 1526                  | 9.4E-14           | 0001                  | 5.6E-14      |
| Secretin     | Type 2, 3 secretion                       | PF00263     | 0636                  | 8.6E-39           | 1039                  | 5.4E-22      |
| Secretin     | Type 2, 3 secretion                       | PF00263     | 1380                  | 1.0E-40           | 1286                  | 6.9E-42      |
| TonB         | Type 2, 3 secretion                       | PF07660     | 0636                  | 1.1E-07           | 1040                  | 1.0E-07      |
| FlgH         | Flagellar L-ring                          | PF02107     | 0734                  | 2.7E-31           | 0605                  | 2.8E-29      |
| FlgI         | Flagellar P-ring                          | PF02119     | Present <sup>d</sup>  | n.d. <sup>e</sup> | 0605                  | 1.9E-139     |

<sup>a</sup> After Sutcliffe (2011)<sup>31</sup>.

<sup>b</sup> Numbers correspond to the gene number in the assemblies on RAST and submitted to Genbank.

<sup>c</sup> OM, outer membrane.

<sup>d</sup> Uncalled CDS; has first 104 bp of 1113 bp gene, positions 12267-12370 of cSCG contig077\_S08.

<sup>e</sup> n.d., not determined

Supplementary Table S5. List of CDSs<sup>a</sup> in OP9-cSCG and OP9-77CS discussed in the text and Figure 4

| Pathway and functional annotation in RAST                                | 77CS<br>CDS | cSCG<br>CDS                | Predicted amino<br>acid % identity <sup>d</sup>                       |
|--------------------------------------------------------------------------|-------------|----------------------------|-----------------------------------------------------------------------|
| <b>Oligosaccharide utilization</b>                                       |             |                            |                                                                       |
| Beta-glucosidase (EC 3.2.1.21)                                           | 1643        | 1812                       | 95.45                                                                 |
| Beta-glucosidase (EC 3.2.1.21)                                           | 2453        | 2276                       | 93.88                                                                 |
| Alpha-galactosidase (EC 3.2.1.22)                                        | 1881        | 1082                       | 94.35                                                                 |
| Alpha-xylosidase (EC 3.2.1.-)                                            | 1007        | 1197                       | 94.41                                                                 |
| Endo-1,4-beta-glucanase                                                  | 1856        | 0402                       | 90.34                                                                 |
| Alpha-N-arabinofuranosidase (EC 3.2.1.55 )                               | 1750        | 1423                       | 95.87                                                                 |
| Endo-1,4-beta-xylanase A precursor (EC 3.2.1.8)                          | 1945        | 1420                       | 95.8                                                                  |
| Beta-mannosidase (EC 3.2.1.25)                                           | 0690        | 0859                       | 96.79                                                                 |
| 4-alpha-glucanotransferase (amylomaltase) (EC 2.4.1.25)                  | 1053        | 0520                       | 87.76                                                                 |
| Amylopullulanase                                                         | 0297        | 0334                       | 93.89                                                                 |
| Alpha-L-rhamnosidase (EC 3.2.1.40)                                       | Absent      | 1984                       | 0                                                                     |
| Beta-galactosidase (3.2.1.23)                                            | 1215        | Absent                     | 0                                                                     |
| Alpha-L-fucosidase (3.2.1.51)                                            | 1219        | Absent                     | 0                                                                     |
| <b>Glycolysis</b>                                                        |             |                            |                                                                       |
| Glucokinase, ROK family protein (EC 2.7.1.2)                             | 0659        | 1019                       | 85.63                                                                 |
| Glucose-6-phosphate isomerase (EC 5.3.1.9)                               | 1096        | 0021                       | 91.07                                                                 |
| Glucose-6-phosphate isomerase (EC 5.3.1.9), archaeal                     | 0985        | 1179                       | 97.88                                                                 |
| 6-phosphofructokinase (EC 2.7.1.11)                                      | 0342        | 0165                       | 98.61                                                                 |
| Fructose-bisphosphate aldolase class II (EC 4.1.2.13)                    | 0513        | 0805                       | 99.38                                                                 |
| NAD-dependent glyceraldehyde-3-phosphate dehydrogenase (EC 1.2.1.12)     | 0131        | Not<br>called <sup>b</sup> | 92% nt id to 743-<br>1 cSCG contig017 <sup>c</sup>                    |
| Phosphoglycerate kinase (EC 2.7.2.3)                                     | 0167        | 0143                       | 97.73                                                                 |
| 2,3-bisphosphoglycerate-independent phosphoglycerate mutase (EC 5.4.2.1) | 1482        | 0349                       | 97.02                                                                 |
| Enolase (EC 4.2.1.11)                                                    | 0582        | 0882                       | 96.96                                                                 |
| Pyruvate kinase (EC 2.7.1.40)                                            | 1594        | 0456                       | 95.34                                                                 |
| <b>Pentose phosphate pathway and xylose utilization (key genes)</b>      |             |                            |                                                                       |
| Transaldolase (EC 2.2.1.2)                                               | 0514        | 0806                       | 98.16                                                                 |
| Transketolase (EC 2.2.1.1)                                               | 0341        | 0166                       | 97.07                                                                 |
| 6-phosphogluconate dehydrogenase, decarboxylating (EC 1.1.1.44)          | 1598        | Not<br>called <sup>b</sup> | 93% nt id to cSCG<br>contig050 712-1,<br>contig051 1-297 <sup>c</sup> |
| Glucose-6-phosphate 1-dehydrogenase (EC 1.1.1.49)                        | 0535        | 0825                       | 95.77                                                                 |
| Glucose-6-phosphate isomerase (EC 5.3.1.9)                               | 1096        | 0021                       | 91.07                                                                 |
| Glucose-6-phosphate isomerase, archaeal (EC 5.3.1.9)                     | 0985        | 1179                       | 97.88                                                                 |

|                                                 |       |        |       |
|-------------------------------------------------|-------|--------|-------|
| Ribulose-phosphate 3-epimerase (EC 5.1.3.1)     | 0328  | 0179   | 97.75 |
| Ribulose-phosphate 3-epimerase (EC 5.1.3.1)     | 2019  | 0982   | 97.27 |
| Ribose 5-phosphate isomerase B (EC 5.3.1.6)     | 0027  | 1554   | 96.64 |
| Ribose 5-phosphate isomerase B (EC 5.3.1.6)     | 0341  | 0304   | 97.33 |
| Ribose-phosphate pyrophosphokinase (EC 2.7.6.1) | 0593  | Absent | 0     |
| Putative xylose isomerase xylA                  | 0968  | 1712   | 96.9  |
| Xylulose kinase (EC 2.7.1.17)                   | 00969 | 1713   | 92.41 |

---

#### Pyruvate and acetate catabolism

|                                                                |      |                         |                                                   |
|----------------------------------------------------------------|------|-------------------------|---------------------------------------------------|
| Pyruvate:ferredoxin oxidoreductase, gamma subunit (EC 1.2.7.1) | 0740 | 0394                    | 97.37                                             |
| Pyruvate:ferredoxin oxidoreductase, delta subunit (EC 1.2.7.1) | 0741 | 0395                    | 95.79                                             |
| Pyruvate:ferredoxin oxidoreductase, alpha subunit (EC 1.2.7.1) | 0742 | 0396                    | 96.28                                             |
| Pyruvate:ferredoxin oxidoreductase, beta subunit (EC 1.2.7.1)  | 0743 | 0398                    | 98.7                                              |
| Acetate kinase (EC 2.7.2.1)                                    | 0103 | 0085                    | 99.12                                             |
| Acetate kinase (EC 2.7.2.1)                                    | 1121 | 1740                    | 96.97                                             |
| Phosphate acetyltransferase (EC 2.3.1.8)                       | 0104 | Not called <sup>b</sup> | 88% nt id to 752-1 of cSCG contig011 <sup>c</sup> |
| Aldehyde dehydrogenase (EC 1.2.1.3)                            | 1397 | 1916                    | 98.55                                             |
| Alcohol dehydrogenase (EC 1.1.1.1)                             | 0206 | 1634                    | 95.81                                             |
| Alcohol dehydrogenase (EC 1.1.1.1)                             | 1647 | 1824                    | 93.96                                             |

---

#### Bidirectional NiFe (sulf)hydrogenase

|                                                                  |      |      |       |
|------------------------------------------------------------------|------|------|-------|
| heterodisulfide reductase, iron-sulfur binding subunit, putative | 1449 | 1662 | 96.84 |
| Heterodisulfide reductase, cytochrome reductase subunit          | 1448 | 1661 | 97.84 |
| NAD-reducing hydrogenase subunit HoxY (EC 1.12.1.2)              | 1447 | 1660 | 98.06 |
| Uptake hydrogenase large subunit (EC 1.12.99.6)                  | 1446 | 1659 | 97.09 |

---

#### Bifurcating FeFe hydrogenase

|                                                     |      |      |       |
|-----------------------------------------------------|------|------|-------|
| NAD-reducing hydrogenase subunit HoxE (EC 1.12.1.2) | 1257 | 1329 | 98.21 |
| NAD-reducing hydrogenase subunit HoxF (EC 1.12.1.2) | 1258 | 1330 | 97.17 |
| [Fe] hydrogenase large subunit (EC 1.12.7.2)        | 1259 | 1331 | 96.75 |

---

#### Additional Group A, B and D FeFe hydrogenases

|                                              |      |      |       |
|----------------------------------------------|------|------|-------|
| [Fe] hydrogenase large subunit (EC 1.12.7.2) | 0442 | 0472 | 97.84 |
| [Fe] hydrogenase large subunit, Group C      | 1255 | 1327 | 85.4  |
| [Fe] hydrogenase large subunit, Group D      | 1502 | 0946 | 96.67 |

---

#### Energy conservation

|                                           |      |      |       |
|-------------------------------------------|------|------|-------|
| Pyrophosphate-energized ion pump          | 1020 | 1729 | 98.93 |
| F-type ATP synthase A chain (EC 3.6.3.14) | 0016 | 1542 | 96.38 |
| F-type ATP synthase C chain (EC 3.6.3.14) | 0017 | 1543 | 98.86 |
| F-type ATP synthase B chain (EC 3.6.3.14) | 0018 | 1544 | 92.98 |

|                                                                         |      |      |       |
|-------------------------------------------------------------------------|------|------|-------|
| F-type ATP synthase delta chain (EC 3.6.3.14)                           | 0019 | 1545 | 95.24 |
| F-type ATP synthase alpha chain (EC 3.6.3.14)                           | 0020 | 1546 | 94.86 |
| F-type ATP synthase gamma chain (EC 3.6.3.14)                           | 0021 | 1547 | 92.96 |
| F-type ATP synthase beta chain (EC 3.6.3.14)                            | 0022 | 1548 | 97.65 |
| F-type ATP synthase epsilon chain (EC 3.6.3.14)                         | 0023 | 1549 | 91.24 |
| V-type ATP synthase subunit D (EC 3.6.3.14)                             | 0235 | 0279 | 99.02 |
| V-type ATP synthase subunit B (EC 3.6.3.14)                             | 0236 | 0280 | 99.14 |
| V-type ATP synthase subunit A (EC 3.6.3.14)                             | 0237 | 0281 | 98.15 |
| V-type ATP synthase subunit F (EC 3.6.3.14)                             | 0238 | 0282 | 95.54 |
| V-type H <sup>+</sup> -transporting two-sector ATPase, C (AC39) subunit | 0239 | 0283 | 94.28 |
| V-type H <sup>+</sup> -transporting ATP synthase, subunit E             | 0240 | 0284 | 97.46 |
| V-type ATP synthase subunit K (EC 3.6.3.14)                             | 0241 | 0285 | 99.37 |
| V-type ATP synthase subunit I (EC 3.6.3.14)                             | 0242 | 0286 | 97.37 |
| Electron transport complex protein RnfC                                 | 0474 | 0599 | 96.73 |
| Electron transport complex protein RnfD                                 | 0475 | 0598 | 89.63 |
| Electron transport complex protein RnfG                                 | 0476 | 0597 | 94.09 |
| Electron transport complex protein RnfE                                 | 0477 | 0596 | 97.99 |
| Electron transport complex protein RnfA                                 | 0478 | 0595 | 97.96 |
| Electron transport complex protein RnfB                                 | 0479 | 0594 | 95.99 |

#### ECF transporters

---

|                                                                                          |      |      |       |
|------------------------------------------------------------------------------------------|------|------|-------|
| ATPase component of general energizing module of ECF transporters                        | 0900 | 0555 | 96.74 |
| ATPase component of general energizing module of ECF transporters                        | 0901 | 0556 | 97.95 |
| Transmembrane component of general energizing module of ECF transporters                 | 0902 | 0558 | 95.15 |
| Substrate-specific component PanT of predicted pantothenate ECF transporter              | 1789 | 0053 | 94.77 |
| Substrate-specific component QueT of predicted queuosine-regulated ECF transporter       | 0113 | 0095 | 96.05 |
| Substrate-specific component FolT of folate ECF transporter                              | 0329 | 0178 | 97.09 |
| Substrate-specific component BioY of biotin ECF transporter                              | 2053 | 1132 | 94.54 |
| Transmembrane component CbiQ of energizing module of cobalt ECF transporter              | 1912 | 1470 | 92.42 |
| Additional substrate-specific component CbiN of cobalt ECF transporter                   | 1913 | 1471 | 95.45 |
| Substrate-specific component CbiM of cobalt ECF transporter                              | 1914 | 1472 | 96.12 |
| Substrate-specific component RibU of riboflavin ECF transporter                          | 0067 | 1594 | 95.96 |
| Substrate-specific component CblT of predicted ECF transporter for dimethylbenzimidazole | 1645 | 1822 | 96.08 |

#### Nitrogen assimilation

---

|                                                                         |      |      |       |
|-------------------------------------------------------------------------|------|------|-------|
| Ammonium transporter                                                    | 1938 | 1700 | 96.86 |
| Nitrogen regulatory protein P-II                                        | 1939 | 1701 | 100   |
| Glutamine synthetase type I (EC 6.3.1.2)                                | 1752 | 0219 | 97.52 |
| Glutamine amidotransferase, class-II                                    | 1753 | 0218 | 98.09 |
| Glutamate synthase [NADPH] large chain (EC 1.4.1.13)                    | 1754 | 0217 | 99.21 |
| Nitrite reductase probable electron transfer 4Fe-S subunit (EC 1.7.1.4) | 1755 | 0216 | 95.8  |
| Nitrite reductase probable [NAD(P)H] subunit (EC 1.7.1.4)               | 1756 | 0215 | 95.51 |
| Glutamate synthase, alpha subunit domain protein                        | 1757 | 0214 | 97.55 |

Motility and chemotaxis

|                                                                          |      |                         |                                                    |
|--------------------------------------------------------------------------|------|-------------------------|----------------------------------------------------|
| flagellar basal body rod protein                                         | 0602 | 0731                    | 93.23                                              |
| Flagellar basal-body rod protein FlgG                                    | 0603 | 0732                    | 99.62                                              |
| Flagellar basal-body P-ring formation protein FlgA                       | 0604 | 0733                    | 89.52                                              |
| Flagellar L-ring protein FlgH                                            | 0605 | 0734                    | 91.37                                              |
| Flagellar P-ring protein FlgI                                            | 0606 | Not called <sup>b</sup> | 95% nt id to 12267-12370 of contig077 <sup>c</sup> |
| Flagellar hook-associated protein FlgK                                   | 0611 | Absent                  | 0                                                  |
| Flagellar hook-associated protein FlgL                                   | 0612 | 0735                    | 92.01                                              |
| Flagellar assembly factor FlhW                                           | 0613 | Absent                  | 0                                                  |
| Methyl-accepting chemotaxis protein                                      | 0512 | 0804                    | 88.36                                              |
| Methyl-accepting chemotaxis protein                                      | 0703 | 0251                    | 95.39                                              |
| Methyl-accepting chemotaxis protein                                      | 2121 | 1467                    | 97.54                                              |
| Methyl-accepting chemotaxis protein                                      | 2133 | 1509                    | 95.72                                              |
| Positive regulator of CheA protein activity (CheW)                       | 0468 | 0604                    | 97.45                                              |
| Signal transduction histidine kinase CheA (EC 2.7.3.-)                   | 1460 | 1293                    | 85.61                                              |
| Chemotaxis regulator CheY                                                | 1459 | 1292                    | 98.35                                              |
| Chemotaxis protein CheD                                                  | 1291 | 1251                    | 96.2                                               |
| Chemotaxis protein CheC -- inhibitor of MCP methylation                  | 1292 | 1252                    | 99.03                                              |
| Chemotaxis protein methyltransferase CheR (EC 2.1.1.80)                  | 1293 | 1253                    | 96.99                                              |
| Chemotaxis regulator protein-glutamate methylesterase CheB (EC 3.1.1.61) | 1294 | 1254                    | 92.61                                              |
| conserved hypothetical protein related to flagellar biosynthesis         | 1295 | 1255                    | 97.67                                              |
| Flagellar biosynthesis protein FlhA                                      | 1296 | 1256                    | 98.24                                              |
| Flagellar biosynthesis protein FlhB                                      | 1297 | 1257                    | 95.22                                              |
| Flagellar biosynthesis protein FlhR                                      | 1298 | 1258                    | 94.12                                              |
| Flagellar biosynthesis protein FliQ                                      | 1299 | 1259                    | 95.51                                              |
| Flagellar biosynthesis protein FlhP                                      | 1300 | 1260                    | 96.65                                              |
| hypothetical protein                                                     | 1301 | 1261                    | 89.05                                              |
| Flagellar motor switch protein FliN                                      | 1302 | 1262                    | 92.73                                              |
| Flagellar motor switch protein FliM                                      | 1303 | 1263                    | 97.87                                              |
| Flagellar motor rotation protein MotB                                    | 1746 | 1265                    | 97.91                                              |
| Flagellar motor rotation protein MotA                                    | 1745 | 1266                    | 98.55                                              |
| Flagellar protein FliD                                                   | 1744 | 1267                    | 91.89                                              |
| Flagellar hook protein FlgE                                              | 1742 | 1268                    | 90.28                                              |
| Putative flagellar hook associated protein                               | 1741 | 1269                    | 89.23                                              |
| Flagellar basal-body rod modification protein FlgD                       | 1740 | 1270                    | 93.8                                               |
| Flagellar protein FliJ                                                   | 1736 | 1274                    | 97.35                                              |
| Flagellum-specific ATP synthase FliI                                     | 1930 | 1275                    | 98.55                                              |
| Flagellar assembly protein FliH                                          | 1931 | 1276                    | 93.89                                              |
| Flagellar motor switch protein FliG                                      | 1932 | 1277                    | 98.94                                              |
| Flagellar M-ring protein FliF                                            | 1933 | 1278                    | 96.23                                              |
| Flagellar hook-basal body complex protein FliE                           | 1934 | 1279                    | 75.53                                              |



|                                        |      |      |       |
|----------------------------------------|------|------|-------|
| Flagellar basal-body rod protein FlgC  | 1935 | 1280 | 93.48 |
| Flagellar basal-body rod protein FlgB  | 2304 | 1281 | 93.33 |
| Flagellin protein FlaA                 | 2070 | 1768 | 95.15 |
| flagellar protein FlaG protein         | 2071 | 1769 | 94.87 |
| Flagellar hook-associated protein FlhD | 2072 | 1770 | 92.67 |
| Flagellar biosynthesis protein FlhS    | 2073 | 1771 | 98.47 |

---

ABC transporters, amino acids and peptides

|                                                                                               |      |      |       |
|-----------------------------------------------------------------------------------------------|------|------|-------|
| Methionine ABC transporter ATP-binding protein                                                | 0062 | 1589 | 97.74 |
| ABC transporter permease protein                                                              | 0063 | 1590 | 98.07 |
| ABC transporter substrate-binding protein                                                     | 0064 | 1591 | 96.72 |
| Glutamine ABC transporter, periplasmic glutamine-binding protein (TC 3.A.1.3.2)               | 1098 | 0020 | 98.02 |
| glutamine ABC transporter, permease protein (glnP)                                            | 1099 | 0019 | 97.25 |
| glutamine ABC transporter ATP-binding protein                                                 | 1100 | 0018 | 99.19 |
| Branched-chain amino acid transport ATP-binding protein LivF (TC 3.A.1.4.1)                   | 0108 | 0089 | 95.58 |
| Branched-chain amino acid transport ATP-binding protein LivG (TC 3.A.1.4.1)                   | 0109 | 0090 | 91.57 |
| High-affinity branched-chain amino acid transport system permease protein LivH (TC 3.A.1.4.1) | 0110 | 0091 | 95.74 |
| Branched-chain amino acid ABC transporter, amino acid-binding protein (TC 3.A.1.4.1)          | 0111 | 0092 | 97.11 |
| Branched-chain amino acid transport ATP-binding protein LivF (TC 3.A.1.4.1)                   | 0229 | 0273 | 96.6  |
| Branched-chain amino acid transport ATP-binding protein LivG (TC 3.A.1.4.1)                   | 0230 | 0274 | 97.68 |
| Branched-chain amino acid transport system permease protein LivM (TC 3.A.1.4.1)               | 0231 | 0275 | 95.21 |
| High-affinity branched-chain amino acid transport system permease protein LivH (TC 3.A.1.4.1) | 0232 | 0276 | 97.31 |
| Branched-chain amino acid ABC transporter, amino acid-binding protein (TC 3.A.1.4.1)          | 0233 | 0277 | 97.06 |
| Oligopeptide transport ATP-binding protein OppF (TC 3.A.1.5.1)                                | 0122 | 0104 | 92.24 |
| Oligopeptide transport ATP-binding protein OppD (TC 3.A.1.5.1)                                | 0123 | 0105 | 94.64 |
| Dipeptide transport system permease protein DppC (TC 3.A.1.5.2)                               | 0124 | 0106 | 97.83 |
| Dipeptide transport system permease protein DppB (TC 3.A.1.5.2)                               | 0125 | 0412 | 40.82 |
| Dipeptide-binding ABC transporter, periplasmic substrate-binding component (TC 3.A.1.5.2)     | 0127 | 0416 | 32.76 |
| Dipeptide transport system permease protein DppB (TC 3.A.1.5.2)                               | 0353 | 0412 | 98.2  |
| Dipeptide transport system permease protein DppC (TC 3.A.1.5.2)                               | 0354 | 0413 | 95.38 |
| Oligopeptide transport ATP-binding protein OppD (TC 3.A.1.5.1)                                | 0355 | 0414 | 84.86 |
| Oligopeptide transport ATP-binding protein OppF (TC 3.A.1.5.1)                                | 0356 | 0415 | 77.81 |
| Dipeptide-binding ABC transporter, periplasmic substrate-binding component (TC 3.A.1.5.2)     | 0357 | 0416 | 96.32 |

---

ABC transporters, zinc and phosphate

|                                                                                      |      |      |       |
|--------------------------------------------------------------------------------------|------|------|-------|
| Zinc ABC transporter, inner membrane permease protein ZnuB                           | 0732 | 0383 | 91.42 |
| Zinc ABC transporter, ATP-binding protein ZnuC                                       | 0733 | 0384 | 96.18 |
| Zinc ABC transporter, periplasmic-binding protein ZnuA                               | 0734 | 0385 | 92.5  |
| Phosphate transport system permease protein PstA (TC 3.A.1.7.1)                      | 0345 | 0404 | 93.47 |
| Phosphate transport system permease protein PstC (TC 3.A.1.7.1)                      | 0346 | 0405 | 96.35 |
| Phosphate ABC transporter, periplasmic phosphate-binding protein PstS (TC 3.A.1.7.1) | 0347 | 0406 | 97.27 |
| Phosphate transport ATP-binding protein PstB (TC 3.A.1.7.1)                          | 1713 | 1851 | 97.24 |

|                                                                                         |      |      |       |
|-----------------------------------------------------------------------------------------|------|------|-------|
| Phosphate transport system permease protein PstA (TC 3.A.1.7.1)                         | 1714 | 1852 | 95.42 |
| Phosphate transport system permease protein PstC (TC 3.A.1.7.1)                         | 1715 | 1853 | 96.06 |
| <hr/>                                                                                   |      |      |       |
| ABC transporters, saccharides                                                           |      |      |       |
| Maltose/maltodextrin ABC transporter, permease protein MalF                             | 0369 | 0426 | 97.73 |
| sugar ABC transporter permease protein                                                  | 0370 | 0427 | 97.45 |
| SugC                                                                                    | 0371 | 0428 | 95.09 |
| ABC transporter, ATP-binding protein SugC                                               | 0372 | 0429 | 92.93 |
| Maltose/maltodextrin ABC transporter, permease protein MalF                             | 0688 | 0857 | 96.85 |
| Maltose/maltodextrin ABC transporter, permease protein MalG                             | 0689 | 0858 | 93.97 |
| Ribose ABC transport system, periplasmic ribose-binding protein RbsB (TC 3.A.1.2.1)     | 0838 | 1049 | 95.94 |
| Ribose ABC transport system, permease protein RbsC (TC 3.A.1.2.1)                       | 0839 | 1050 | 99.08 |
| Ribose ABC transport system, ATP-binding protein RbsA (TC 3.A.1.2.1)                    | 0840 | 1051 | 96.23 |
| Ribose ABC transport system, permease protein RbsC (TC 3.A.1.2.1)                       | 0826 | 1034 | 95.88 |
| ABC transporter related                                                                 | 0827 | 1035 | 91.6  |
| ABC-type sugar transport system periplasmic component-like protein                      | 0828 | 1036 | 98.84 |
| Multiple sugar-binding transport atp-binding protein msmk                               | 1311 | 0463 | 95.35 |
| Dihydroxyacetone ABC transport system, permease protein                                 | 1312 | 0462 | 93.41 |
| probable sugar ABC transporter, permease protein                                        | 1313 | 0461 | 98.66 |
| probable sugar ABC transporter, substrate-binding protein                               | 1308 | 0468 | 86.01 |
| Maltose/maltodextrin ABC transporter, permease protein MalG                             | 1345 | 1390 | 94.68 |
| Multiple sugar ABC transporter, membrane-spanning permease protein MsmF                 | 1346 | 1389 | 98.3  |
| Multiple sugar ABC transporter, substrate-binding protein                               | 1347 | 1388 | 98.11 |
| sugar ABC transporter, ATP-binding protein                                              | 1400 | 1914 | 98.8  |
| sugar ABC transporter, ATP-binding protein                                              | 1401 | 1913 | 97.89 |
| Maltose/maltodextrin ABC transporter, permease protein MalG                             | 1403 | 1911 | 98.17 |
| ABC sugar transporter, permease component                                               | 1404 | 1910 | 97.74 |
| ABC transporter, periplasmic substrate-binding protein                                  | 1405 | 1908 | 98.7  |
| ABC transporter periplasmic binding protein                                             | 1522 | 1055 | 94.99 |
| inner-membrane translocator                                                             | 1523 | 1056 | 95.77 |
| sugar ABC transporter, permease protein                                                 | 1524 | 1057 | 98.02 |
| ribose ABC transporter ATP-binding                                                      | 1525 | 1058 | 96.91 |
| Xylose oligosaccharides ABC transporter, sugar-binding protein                          | 1638 | 1807 | 98.75 |
| Oligopeptide transport system permease protein OppB (TC 3.A.1.5.1)                      | 1639 | 1808 | 99.4  |
| Xylose oligosaccharides ABC transporter, permease protein 2                             | 1640 | 1809 | 98.6  |
| oligopeptide ABC transporter, ATP-binding protein                                       | 1641 | 1810 | 96.99 |
| Xylose oligosaccharides ABC transporter, ATP-binding protein 2                          | 1642 | 1811 | 97.48 |
| Ribose ABC transporter, periplasmic ribose-binding protein RbsB (TC 3.A.1.2.1)          | 1810 | 0026 | 98.75 |
| Ribose ABC transport system, permease protein RbsC (TC 3.A.1.2.1)                       | 1811 | 0027 | 97.92 |
| Putative ribose/galactose/methyl galactoside import ATP-binding protein 1 (EC 3.6.3.17) | 1812 | 0028 | 97.41 |
| Ribose ABC transport system, ATP-binding protein RbsA (TC 3.A.1.2.1)                    | 1827 | 1453 | 97.41 |
| Ribose ABC transport system, permease protein RbsC (TC 3.A.1.2.1)                       | 1828 | 1454 | 97.2  |
| Ribose ABC transport system, periplasmic ribose-binding protein RbsB (TC 3.A.1.2.1)     | 1829 | 1455 | 97.89 |

|                                                                                      |      |      |       |
|--------------------------------------------------------------------------------------|------|------|-------|
| Ribose ABC transport system, permease protein RbsC (TC 3.A.1.2.1)                    | 1830 | 1456 | 90.06 |
| COG1172: Ribose/xylose/arabinose/galactoside ABC-type transport systems, permease    | 2039 | 1901 | 96.76 |
| Ribose/xylose/arabinose/galactoside ABC-type transport systems, permease component 1 | 2040 | 1900 | 98.04 |
| ABC transporter, ATP-binding protein                                                 | 2041 | 1897 | 96.12 |
| ribose ABC transporter, periplasmic binding protein                                  | 2066 | 1988 | 98.78 |
| ribose ABC transporter permease                                                      | 2067 | 1987 | 99.43 |
| Monosaccharide-transporting ATPase( EC:3.6.3.17 )                                    | 2068 | 2288 | 100   |

<sup>a</sup> Numbers correspond to the gene number in the assemblies on RAST and submitted to Genbank.

<sup>b</sup> ORF was not called in cSCG, but was detected by BLASTn of corresponding gene in OP9-77CS.

<sup>c</sup> Nucleotide identity and region of cSCG detected by BLASTn of corresponding gene in OP9-77CS.

<sup>d</sup> Percent identity of predicted amino acid sequences for a given gene in the OP9-cSCG and OP9-77CS.

## Supplementary References

61. Dereeper, A. *et al.* Phylogeny.fr: robust phylogenetic analysis for the non-specialist. *Nucleic Acids Res.* **36**, W465–469 (2008).
62. Edgar, R. C. MUSCLE: a multiple sequence alignment method with reduced time and space complexity. *BMC Bioinformatics* **5**, 113 (2004).
63. Guindon, S. & Gascuel, O. A simple, fast, and accurate algorithm to estimate large phylogenies by maximum likelihood. *Syst. Biol.* **52**, 696–704 (2003).
64. Chevenet, F., Brun, C., Bañuls, A.-L., Jacq, B. & Christen, R. TreeDyn: towards dynamic graphics and annotations for analyses of trees. *BMC Bioinformatics* **7**, 439 (2006).
65. Anisimova, M. & Gascuel, O. Approximate likelihood-ratio test for branches: A fast, accurate, and powerful alternative. *Syst. Biol.* **55**, 539–552 (2006).
66. Lau, M., Aitchison, J. & Pointing, S. Bacterial community composition in thermophilic microbial mats from five hot springs in central Tibet. *Extremophiles* **13**, 139–149 (2009).
67. Sayeh, R. *et al.* Microbial diversity in Tunisian geothermal springs as detected by molecular and culture-based approaches. *Extremophiles* **14**, 501–514 (2010).
68. Burgess, E. A., Unrine, J. M., Mills, G. L., Romanek, C. S. & Wiegel, J. Comparative geochemical and microbiological characterization of two thermal pools in the Uzon Caldera, Kamchatka, Russia. *Microb. Ecol.* **63**, 471–489 (2012).

69. Sievert, S. M., Kuever, J. & Muyzer, G. Identification of 16S ribosomal DNA-defined bacterial populations at a shallow submarine hydrothermal vent near Milos Island (Greece). *Appl. Environ. Microbiol.* **66**, 3102–3109 (2000).
70. Dillon, J. G., McMath, L. M. & Trout, A. L. Seasonal changes in bacterial diversity in the Salton Sea. *Hydrobiologia* **632**, 49–64 (2009).
71. Gittel, A., Kofoed, M. V. W., Sørensen, K. B., Ingvorsen, K. & Schramm, A. Succession of Deferribacteres and Epsilonproteobacteria through a nitrate-treated high-temperature oil production facility. *Syst. Appl. Microbiol.* **35**, 165–174 (2012).
72. Kobayashi, H. *et al.* Phylogenetic diversity of microbial communities associated with the crude-oil, large-insoluble-particle and formation-water components of the reservoir fluid from a non-flooded high-temperature petroleum reservoir. *J. Biosci. Bioeng.* **113**, 204–210 (2012).
73. Yamane, K., Hattori, Y., Ohtagaki, H. & Fujiwara, K. Microbial diversity with dominance of 16S rRNA gene sequences with high GC contents at 74 and 98 °C subsurface crude oil deposits in Japan. *FEMS Microbiol. Ecol.* **76**, 220–235 (2011).
74. Pham, V. D. *et al.* Characterizing microbial diversity in production water from an Alaskan mesothermic petroleum reservoir with two independent molecular methods. *Environ. Microbiol.* **11**, 176–187 (2009).
75. Sugihara, T. *et al.* Unique diversity content of a thermophilic anaerobic microbial consortium that utilizes propionate in a synthetic medium. *J. Gen. Appl. Microbiol.* **53**, 363–369 (2007).
76. Wrighton, K. C. *et al.* A novel ecological role of the Firmicutes identified in thermophilic microbial fuel cells. *ISME J* **2**, 1146–1156 (2008).

77. Krakat, N., Westphal, A., Schmidt, S. & Scherer, P. Anaerobic digestion of renewable biomass: thermophilic temperature governs methanogen population dynamics. *Appl. Environ. Microbiol.* **76**, 1842–1850 (2010).
78. Worm, P., Fermoso, F. G., Lens, P. N. L. & Plugge, C. M. Decreased activity of a propionate degrading community in a UASB reactor fed with synthetic medium without molybdenum, tungsten and selenium. *Enzyme and Microbial Technology* **45**, 139–145 (2009).
79. Chouari, R. *et al.* Novel predominant archaeal and bacterial groups revealed by molecular analysis of an anaerobic sludge digester. *Environ. Microbiol.* **7**, 1104–1115 (2005).
80. Ito, T., Yoshiguchi, K., Ariesyady, H. D. & Okabe, S. Identification of a novel acetate-utilizing bacterium belonging to Synergistes group 4 in anaerobic digester sludge. *ISME J* **5**, 1844–1856 (2011).
81. Levén, L., Eriksson, A. R. B. & Schnürer, A. Effect of process temperature on bacterial and archaeal communities in two methanogenic bioreactors treating organic household waste. *FEMS Microbiol. Ecol.* **59**, 683–693 (2007).
82. Li, P., Wang, Y., Wang, Y., Liu, K. & Tong, L. Bacterial community structure and diversity during establishment of an anaerobic bioreactor to treat swine wastewater. *Water Science & Technology* **61**, 243 (2010).
83. Li, T., Mazéas, L., Sghir, A., Leblon, G. & Bouchez, T. Insights into networks of functional microbes catalysing methanization of cellulose under mesophilic conditions. *Environ. Microbiol.* **11**, 889–904 (2009).
